# Supplementary figures and images for: DeCAF—Discrimination, Comparison, Alignment Tool for 2D PHarmacophores
Source: MDPI journal article supplement (doi:10.3390/molecules22071128), 2017-07-06

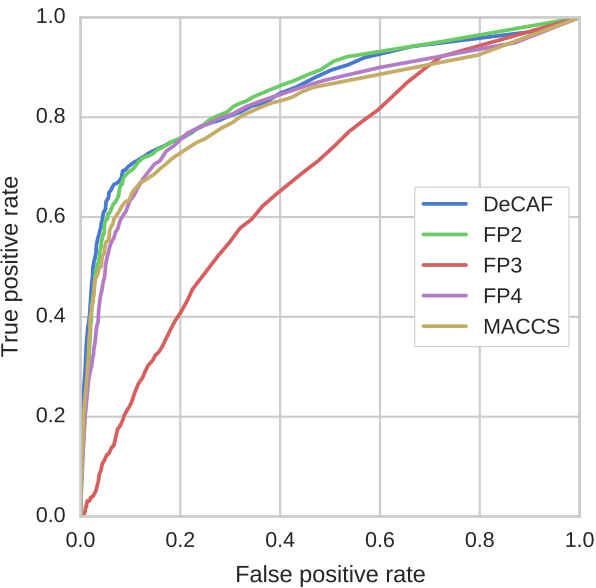

Supplement: s1 [file s1]
